# Supplementary material for: Bile Acid Sequestrant, Sevelamer Ameliorates Hepatic Fibrosis with Reduced Overload of Endogenous Lipopolysaccharide in Experimental Nonalcoholic Steatohepatitis
Source: PubMed Central journal article supplement (PMC7357162; doi:10.3390/microorganisms8060925), 2020-06-19
Supplement: microorganisms-08-00925-s001.pdf [file microorganisms-08-00925-s001.pdf]

**Supplementary Table 1. List of diet component.**

|                      | CDHF | CSNF |
|----------------------|------|------|
| Protein (kcal%)      | 18   | 18   |
| Carbohydrate (kcal%) | 20   | 71   |
| Fat (kcal%)          | 62   | 10   |
| Protein (gm%)        | 23.1 | 17.2 |
| Carbohydrate (gm%)   | 26.3 | 67.4 |
| Fat (gm%)            | 35.7 | 4.3  |
| Fiber (gm%)          | 6.6  | 4.8  |
| Kcal/gm              | 5.2  | 3.8  |
| Casein, 80 Mesh (gm) | 0    | 0    |
| L-Cystine (gm)       | 4.2  | 4.2  |
| L-Isoleucine (gm)    | 7.6  | 7.6  |
| L-Leucine (gm)       | 15.8 | 15.8 |
| L-Lysine (gm)        | 13.2 | 13.2 |
| L-Methionine (gm)    | 0.8  | 5.1  |
| L-Phenylalanine (gm) | 8.4  | 8.4  |
| L-Threonine (gm)     | 7.2  | 7.2  |
| L-tryptophan (gm)    | 2.1  | 2.1  |
| L-Valine (gm)        | 9.3  | 9.3  |
| L-Histidine (gm)     | 4.6  | 4.6  |
| L-Alanine (gm)       | 5.1  | 5.1  |

|                          |       |       |
|--------------------------|-------|-------|
| L-Arginine (gm)          | 6.0   | 6.0   |
| L-Aspartic Acid (gm)     | 12.1  | 12.1  |
| L-Glutamic Acid (gm)     | 38.2  | 38.2  |
| Glycine (gm)             | 3.0   | 3.0   |
| L-Proline (gm)           | 17.8  | 17.8  |
| L-Serine (gm)            | 10.0  | 10.0  |
| L-Tyrosine (gm)          | 9.2   | 9.2   |
| Corn Starch (gm)         | 0     | 502   |
| Maltodextrin 10 (gm)     | 130.1 | 130.1 |
| Sucrose (gm)             | 68.8  | 68.8  |
| Cellulose, BW200 (gm)    | 50    | 50    |
| Soybean Oil (gm)         | 25    | 25    |
| Lard (gm)                | 245   | 20    |
| Mineral Mix S10026 (gm)  | 10    | 10    |
| DiCalcium Phosphate (gm) | 13    | 13    |
| Calcium Carbonate (gm)   | 5.5   | 5.5   |
| Potassium Citrate (gm)   | 16.5  | 16.5  |
| Sodium BiCarbonate (gm)  | 7.5   | 7.5   |
| Vitamine Mix V10001 (gm) | 10    | 10    |
| Choline Bitartrate (gm)  | 0     | 2     |
